# Supplementary material for: Dual pancreatic adrenergic and dopaminergic signaling as a therapeutic target of bromocriptine
Source: PubMed Central journal article supplement — iScience. 2022 Jul 19;25(8):104771. doi: 10.1016/j.isci.2022.104771 (PMC9379584; doi:10.1016/j.isci.2022.104771), 2022-07-19
Supplement: mmc1.pdf [file mmc1.pdf]

**Supplemental information**

**Dual pancreatic adrenergic and dopaminergic  
signaling as a therapeutic target of bromocriptine**

**Despoina Aslanoglou, Suzanne Bertera, Laura Friggeri, Marta Sánchez-Soto, Jeongkyung Lee, Xiangning Xue, Ryan W. Logan, J. Robert Lane, Vijay K. Yechoor, Peter J. McCormick, Jens Meiler, R. Benjamin Free, David R. Sibley, Rita Bottino, and Zachary Freyberg**

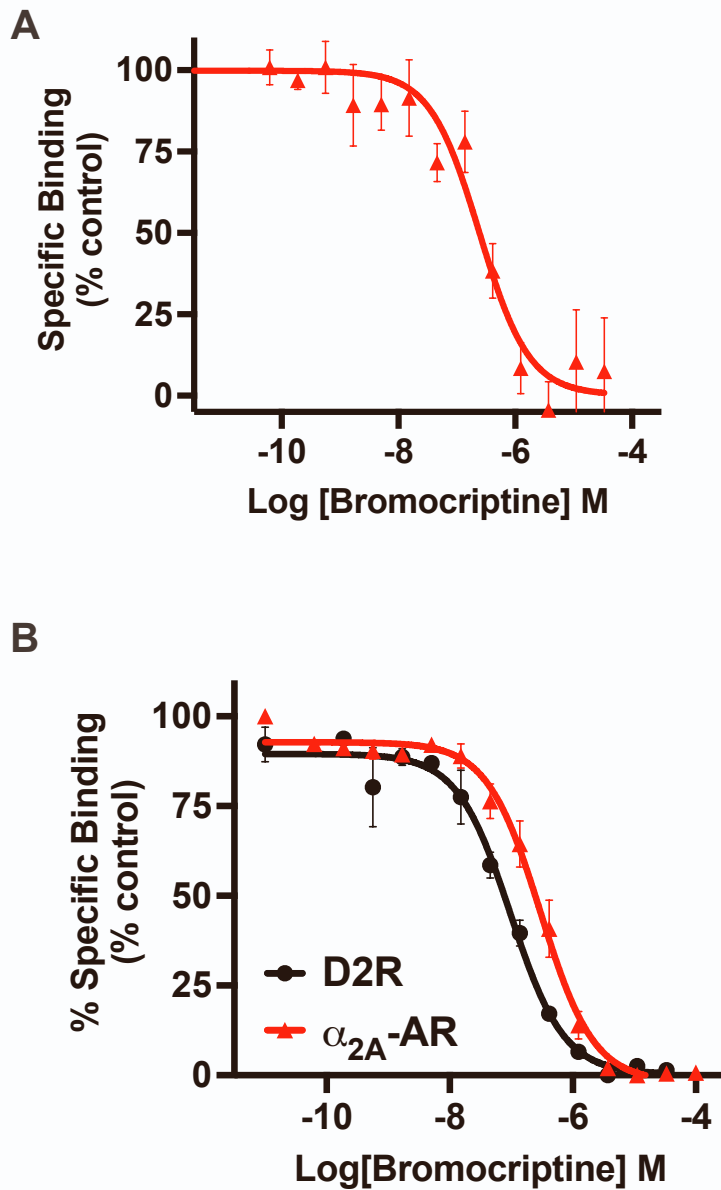

**Figure S1. Bromocriptine binds directly to D2R and  $\alpha_{2A}$ -AR, related to Figure 1. (A)** Radioligand competition with bromocriptine at endogenously expressed  $\alpha_{2A}$ -AR in INS-1E cells. Competition binding curve of the  $\alpha_{2A}$ -AR antagonist [ $^3$ H]-RX821002 versus increasing concentrations of bromocriptine showed binding of bromocriptine to endogenous  $\alpha_{2A}$ -AR expressed in INS-1E cells ( $K_i=161.8$  nM). Radioligand experiments were normalized to % maximal binding. **(B)** Competition binding curves featuring increasing concentrations of bromocriptine using membranes prepared from HEK-293 cells transiently overexpressing  $\alpha_{2A}$ -AR (in red) or D2R (in black) versus [ $^3$ H]-RX821002 or [ $^3$ H]-N-methylspiperone, respectively. Bromocriptine demonstrated 4.6-fold higher affinity for D2R ( $K_i= 43.2$  nM) compared to  $\alpha_{2A}$ -AR ( $K_i= 198.7$  nM). Data represent mean  $\pm$  SEM performed in triplicate from  $n=4$  independent experiments.

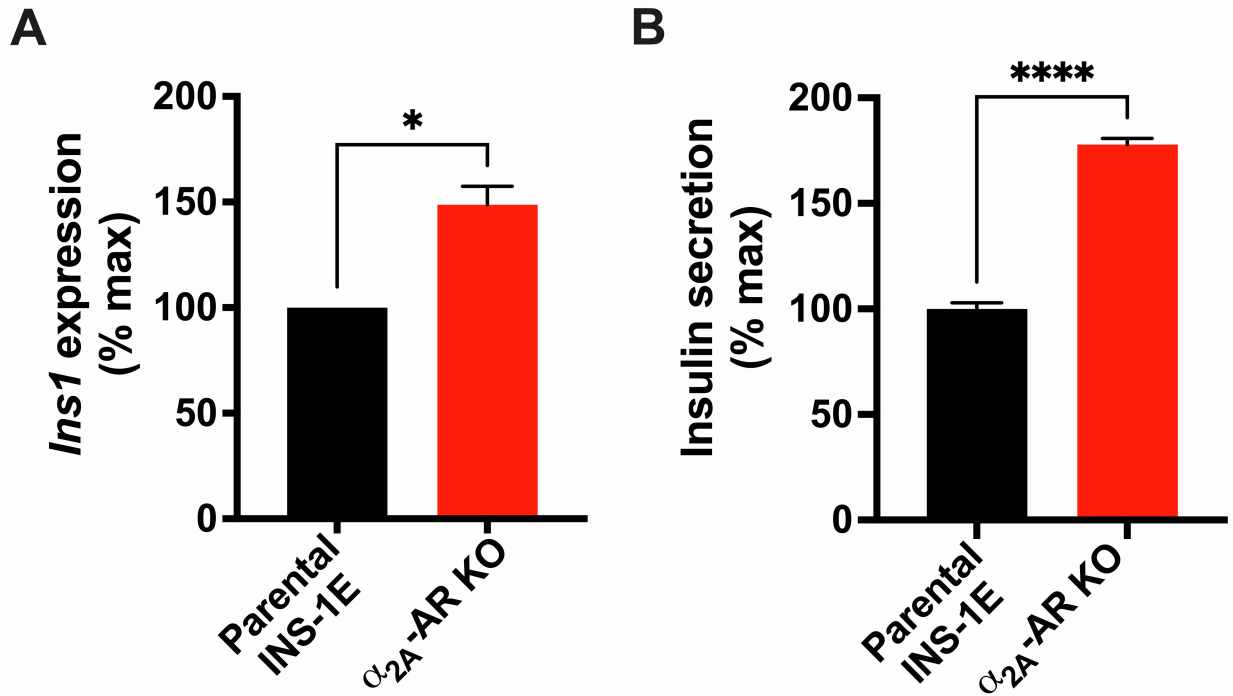

**Figure S2.  $\alpha_{2A}$ -AR KO upregulates *Ins1* expression and increases basal insulin secretion, related to Figure 1. (A)** qPCR analysis comparing *Ins1* expression in  $\alpha_{2A}$ -AR KO cells versus control parental INS-1E cells. *Ins1* mRNA expression was significantly upregulated in  $\alpha_{2A}$ -AR KO cells (in red) compared to the parental INS-1E cells (in black; 48.8% increase,  $p = 0.030$ ). Results were normalized to % *Ins1* expression in the parental INS-1E cells. Assays were independently performed on two separate experimental days. Data are represented as mean  $\pm$  SEM; two-tailed Student's t-test, \* $p < 0.05$ . **(B)**  $\alpha_{2A}$ -AR KO cells (in red) demonstrated significantly enhanced basal insulin secretion in the absence of high glucose stimulation compared to the parental INS-1E cells (in black; 77.9% increase,  $p < 0.0001$ ). Assays were performed in triplicate from  $n \geq 3$  independent experiments. Insulin data were normalized to % maximal secreted insulin. Data are represented as mean  $\pm$  SEM; two-tailed Student's t-test, \*\*\*\* $p < 0.0001$ .

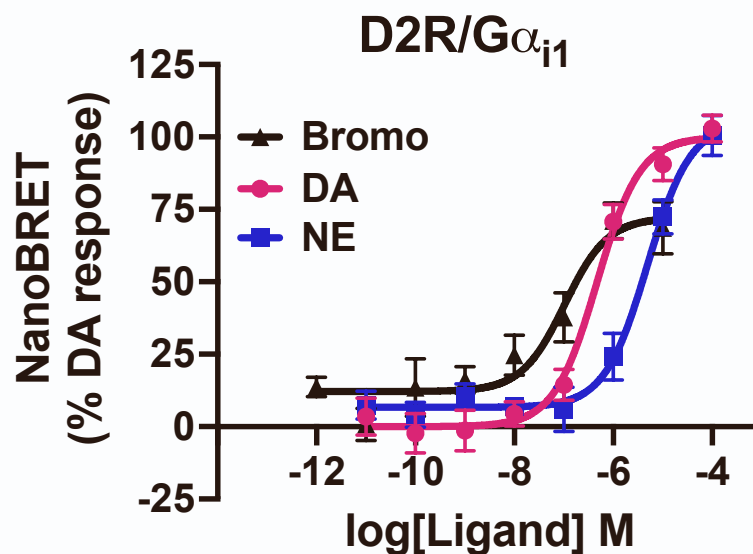

**Figure S3. Bromocriptine stimulation of D2R results in G $\alpha_{i1}$  recruitment, related to Figure 4, Table 5, Table 6.** Concentration-response nanoBRET assays examining drug-stimulated recruitment of Nano-Luc-labeled G $\alpha_{i1}$  in HEK-293T cells expressing HaloTag-labeled D2R. Cells were treated with either bromocriptine (in black), DA (in purple), or NE (in blue). Bromocriptine was more potent in recruiting G $\alpha_{i1}$  to D2R ( $EC_{50}$ =103.8 nM) compared to DA ( $EC_{50}$ =471.1 nM) or NE ( $EC_{50}$ =4897.5 nM), though with reduced efficacy versus these endogenous catecholamines (see **Tables 5, 6**). NanoBRET data were baseline-corrected and normalized to % maximal DA response. Assays were performed in triplicate from n=3 independent experiments. Data are represented as mean  $\pm$  SEM. NanoBRET data from DA and NE dose responses showing coupling of D2R with G $\alpha_{i1}$  were previously published in Aslanoglu et al., 2021.

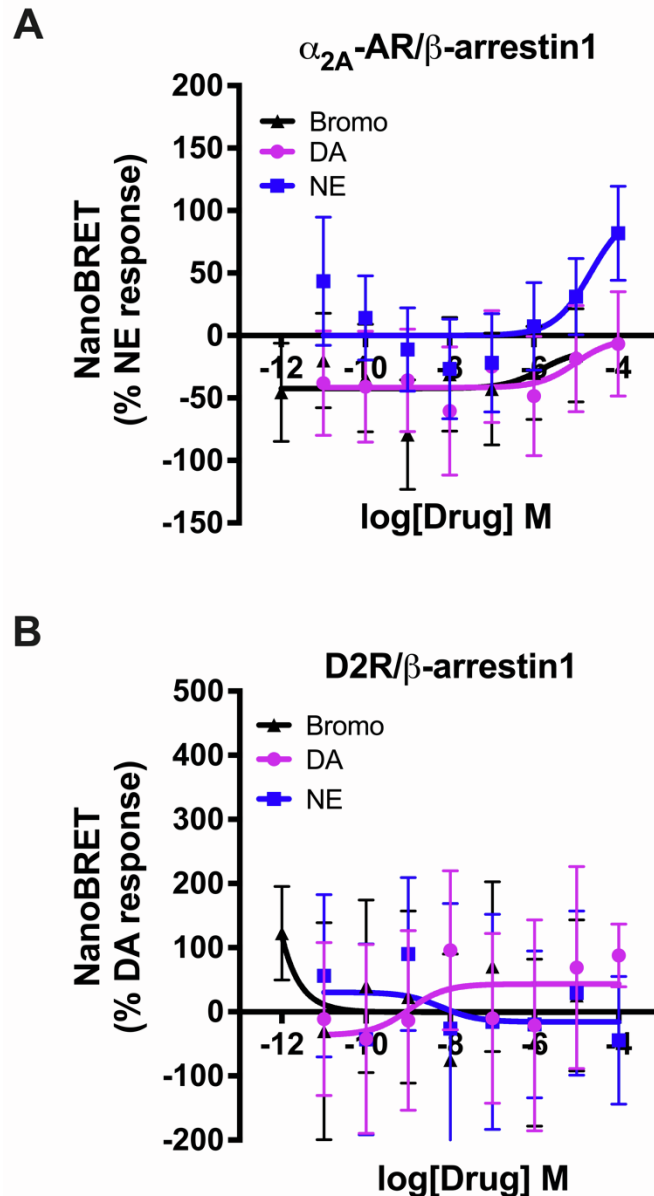

**Figure S4. Bromocriptine stimulation results in negligible  $\beta$ -arrestin1 recruitment to D2R and  $\alpha_{2A}$ -AR, related to Figure 5.** Concentration response curves by nanoBRET examining ligand-stimulated recruitment of  $\beta$ -arrestin1 to D2R versus  $\alpha_{2A}$ -AR. **(A)** Stimulation of  $\alpha_{2A}$ -AR with either bromocriptine, DA, or NE caused only negligible  $\beta$ -arrestin1 receptor recruitment. **(B)** There was no significant dose-dependent  $\beta$ -arrestin2 recruitment to D2R in response to treatment with either bromocriptine, DA, or NE. NanoBRET data were baseline-corrected and normalized to either % maximal DA response for D2R or to % maximal NE response for  $\alpha_{2A}$ -AR. Assays were performed in triplicate from  $n \geq 3$  independent experiments. Data are represented as mean  $\pm$  SEM.

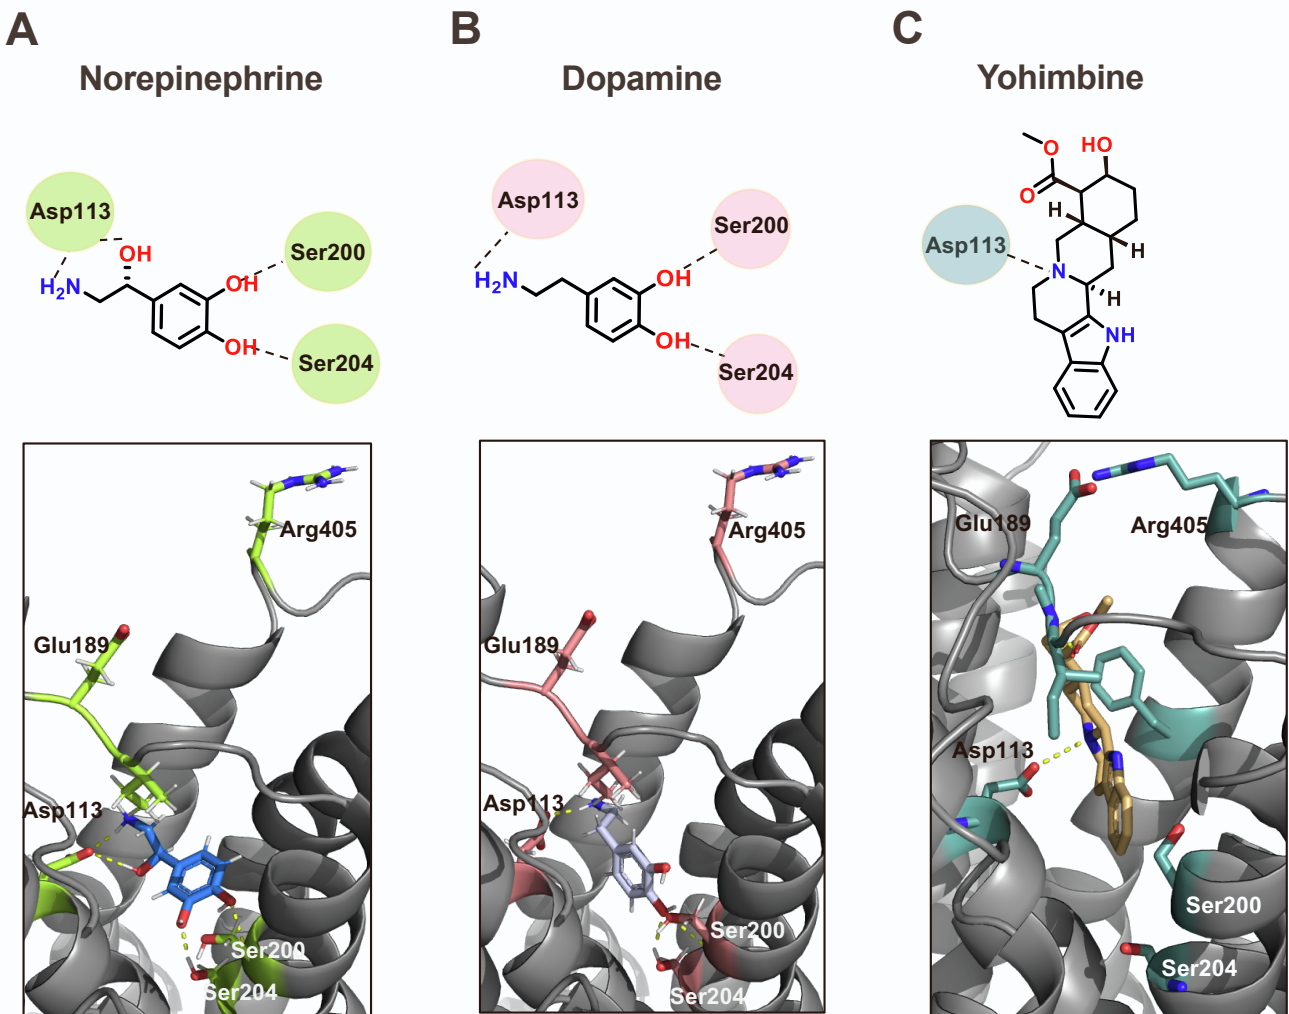

**Figure S5. Predicted binding poses of ligands at  $\alpha_{2A}$ -AR in two- and three-dimensions, related to Figure 6.** Predicted binding poses of three  $\alpha_{2A}$ -AR agonists: **(A)** NE, **(B)** DA and **(C)**  $\alpha_{2A}$ -AR antagonist yohimbine using ROSETTALIGAND docking. Upper panels feature the respective two-dimensional views of ligand binding to  $\alpha_{2A}$ -AR via docking and highlight key binding pocket residues. Lower panels show the predicted binding interactions in three-dimensional models with key amino acid residues highlighted within the  $\alpha_{2A}$ -AR binding pocket.
